# Supplementary material for: Detection of diagnostic and prognostic methylation-based signatures in liquid biopsy specimens from patients with meningiomas
Source: PubMed Central journal article supplement (PMC10499807; doi:10.1038/s41467-023-41434-z), 2023-09-13
Supplement: 41467_2023_41434_MOESM4_ESM.pdf [file 41467_2023_41434_MOESM4_ESM.pdf]

## **Description of Additional Supplementary Files**

### Supplementary Data 1

Description: Clinicopathological and cell type composition estimates through MethyCIBERSORT associated with the serum specimens included in the study.

### Supplementary Data 2

Description: Supplementary data related to meningioma diagnostic-related Figure 1 and Supplementary Figure S3.

### Supplementary Data 3

Description: Supplementary data related to meningioma prognostic-related Figure 2 and Supplementary Figure S5.

### Supplementary Data 4

Description: Supplementary data related to in-silico validation depicted in Figure 4.

### Supplementary Data 5

Description: Supplementary information regarding secondary profiling methods (MethyIPCR, Whole Genome Bisulfite Sequencing/WGBS).
